# Supplementary material for: The Cactus (Opuntia ficus-indica) Cladodes and Callus Extracts: A Study Combined with LC-MS Metabolic Profiling, In-Silico, and In-Vitro Analyses
Source: MDPI journal article supplement (doi:10.3390/antiox12071329), 2023-06-23
Supplement: s1 [file s1]

## Supplementary data

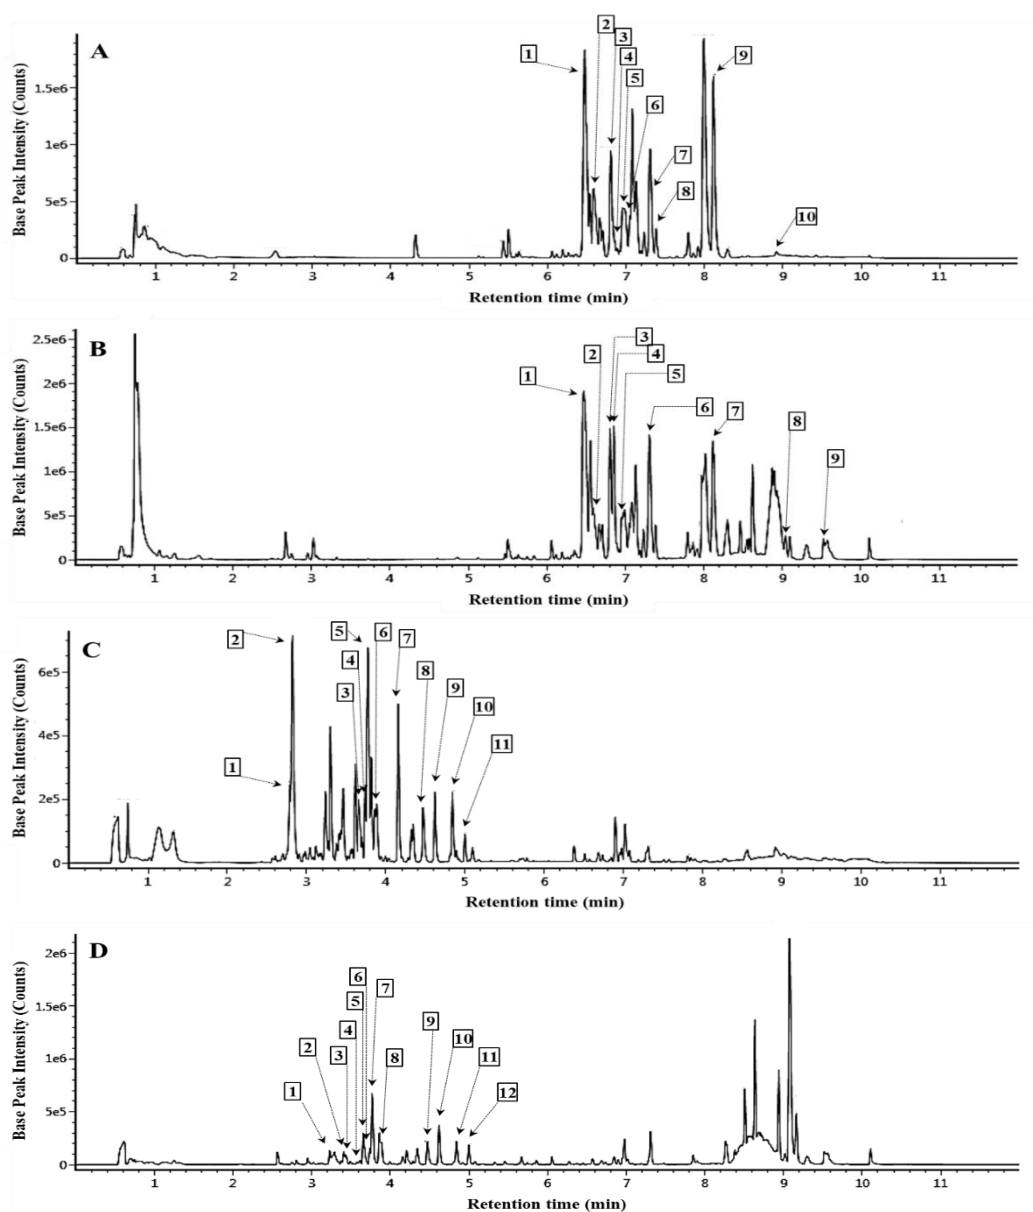

**Figure S1.** UPLC-QTOF-MS metabolite component profile (A) negative ion detected in OFC extract, (B) positive ion detected in OFC extract, (C) negative ion detected in OF extract, and (D) positive ion detected in OF extract. Compound information for each peak number in these chromatogram is shown in Table S1 and S2.

**Table S1.** Identification of metabolite components in OFC extract.

| No.                                  | Metabolite Class | <i>t<sub>R</sub></i> (min) | Tentative identification                | Molecular Formula                                 | Molecular Weight | Error (ppm) | MS/MS Fragments     |
|--------------------------------------|------------------|----------------------------|-----------------------------------------|---------------------------------------------------|------------------|-------------|---------------------|
| <i>Adducts ion [M-H]<sup>-</sup></i> |                  |                            |                                         |                                                   |                  |             |                     |
| 1                                    | Triterpenoid     | 6.48                       | Poricoic acid H                         | C <sub>31</sub> H <sub>48</sub> O <sub>5</sub>    | 499.3430         | -0.24       | 499/437/286/153     |
| 2                                    | Triterpenoid     | 6.59                       | Colossolactone VII                      | C <sub>33</sub> H <sub>50</sub> O <sub>7</sub>    | 557.3480         | 0.62        | 557/539/483         |
| 3                                    | Triterpenoid     | 6.81                       | Poricoic acid A                         | C <sub>31</sub> H <sub>46</sub> O <sub>5</sub>    | 497.3273         | -0.08       | 497/485/318/218/99  |
| 4                                    | Fatty acids      | 6.83                       | LPE (18:2)                              | C <sub>23</sub> H <sub>44</sub> NO <sub>7</sub> P | 476.2784         | -0.37       | 476/424/279/242     |
| 5                                    | Steroid          | 6.88                       | Sootepin D                              | C <sub>31</sub> H <sub>48</sub> O <sub>4</sub>    | 483.3481         | -0.22       | 483/472/99          |
| 6                                    | Ester            | 7.06                       | Cholesteryl hemisuccinate               | C <sub>31</sub> H <sub>50</sub> O <sub>4</sub>    | 485.3636         | 0.15        | 485/396/297/265     |
| 7                                    | Triterpenoid     | 7.31                       | Poricoic acid C                         | C <sub>31</sub> H <sub>46</sub> O <sub>4</sub>    | 481.3324         | -0.06       | 481/470/277/220/99  |
| 8                                    | Fatty acids      | 7.31                       | LPA (18:2)                              | C <sub>21</sub> H <sub>39</sub> O <sub>7</sub> P  | 433.2365         | -0.89       | 433/311/152         |
| 9                                    | Steroid          | 8.12                       | Pachymic acid                           | C <sub>33</sub> H <sub>52</sub> O <sub>5</sub>    | 527.3733         | 2.25        | 527/515/99          |
| 10                                   | Steroid          | 8.94                       | Eburicoic acid                          | C <sub>31</sub> H <sub>50</sub> O <sub>3</sub>    | 469.3676         | 2.99        | 469/458/382/313     |
| <i>Adducts ion [M+H]<sup>+</sup></i> |                  |                            |                                         |                                                   |                  |             |                     |
| 1                                    | Triterpenoid     | 6.47                       | Polyporenic acid C                      | C <sub>31</sub> H <sub>46</sub> O <sub>4</sub>    | 483.3470         | 1.95        | 483/465/381/327/291 |
| 2                                    | Antifungal       | 6.59                       | Leptomycin B                            | C <sub>33</sub> H <sub>48</sub> O <sub>6</sub>    | 541.3524         | 1.93        | 541/523/449/385/165 |
| 3                                    | Triterpenoid     | 6.81                       | Corticatic acid D                       | C <sub>31</sub> H <sub>44</sub> O <sub>4</sub>    | 481.3311         | 2.48        | 481/455/325/165     |
| 4                                    | Fatty acids      | 6.83                       | LPE (18:2)                              | C <sub>23</sub> H <sub>44</sub> NO <sub>7</sub> P | 478.2927         | 2.54        | 478/346/337/328/310 |
| 5                                    | Fatty acids      | 6.85                       | LPC (18:2)                              | C <sub>26</sub> H <sub>50</sub> NO <sub>7</sub> P | 520.3399         | 1.87        | 520/467/327/184     |
| 6                                    | Triterpenoid     | 7.08                       | Corticatic acid B                       | C <sub>31</sub> H <sub>44</sub> O <sub>3</sub>    | 465.3370         | 1.01        | 465/309/165         |
| 7                                    | Triterpenoid     | 8.12                       | 11,13,20,22-Hentriacontatetraynoic acid | C <sub>31</sub> H <sub>46</sub> O <sub>2</sub>    | 451.3569         | 2.71        | 451/433/295/165/128 |
| 8                                    | Fatty amide      | 9.04                       | <i>cis</i> -11-Eicosenamide             | C <sub>20</sub> H <sub>39</sub> NO                | 310.3101         | 4.73        | 310/293/240/144     |
| 9                                    | Fatty amide      | 9.20                       | Erucamide                               | C <sub>22</sub> H <sub>43</sub> NO                | 338.3416         | 3.75        | 338/321/303/268/196 |

**Table S2.** Identification of metabolite components in OF extract.

| No.                                  | Metabolite Class | <i>t<sub>R</sub></i> (min) | Tentative identification                        | Molecular Formula                               | Molecular Weight | Error (ppm) | MS/MS Fragments         |
|--------------------------------------|------------------|----------------------------|-------------------------------------------------|-------------------------------------------------|------------------|-------------|-------------------------|
| <i>Adducts ion [M-H]<sup>-</sup></i> |                  |                            |                                                 |                                                 |                  |             |                         |
| 1                                    | Phenolic         | 2.79                       | 3-Carboxy-4-hydroxy-phenoxy glucoside           | C <sub>13</sub> H <sub>16</sub> O <sub>9</sub>  | 315.0712         | 3.00        | 315/286/200/167/138     |
| 2                                    | Phenolic         | 2.82                       | Piscidic acid                                   | C <sub>11</sub> H <sub>12</sub> O <sub>7</sub>  | 255.0502         | 3.20        | 255/193/165/147/107     |
| 3                                    | Flavonol         | 3.66                       | Isoquercetin (quercetin 3- <i>O</i> -glucoside) | C <sub>21</sub> H <sub>20</sub> O <sub>12</sub> | 463.0871         | 2.42        | 463/433/387/300/205     |
| 4                                    | Flavonol         | 3.74                       | Kaempferol 3- <i>O</i> -rutinoside              | C <sub>27</sub> H <sub>30</sub> O <sub>15</sub> | 593.1497         | 2.47        | 593/551/477/345/206/164 |
| 5                                    | Flavonol         | 3.77                       | Isorhamnetin-3- <i>O</i> -rutinoside            | C <sub>28</sub> H <sub>32</sub> O <sub>16</sub> | 623.1598         | 3.17        | 623/537/385/300         |
| 6                                    | Flavonol         | 3.88                       | Isorhamnetin 3-glucoside                        | C <sub>22</sub> H <sub>22</sub> O <sub>12</sub> | 477.1027         | 2.45        | 477/403/301/243/116     |
| 7                                    | Flavanone        | 4.16                       | Eriodictyol                                     | C <sub>15</sub> H <sub>12</sub> O <sub>6</sub>  | 287.0553         | 2.97        | 287/259/243/163/116     |
| 8                                    | Flavonol         | 4.47                       | Quercetin                                       | C <sub>15</sub> H <sub>10</sub> O <sub>7</sub>  | 301.0343         | 3.44        | 301/233/178/116         |
| 9                                    | Flavonol         | 4.62                       | Isorhamnetin                                    | C <sub>16</sub> H <sub>12</sub> O <sub>7</sub>  | 315.0500         | 3.13        | 315/300/271/243/116     |
| 10                                   | Flavonol         | 4.85                       | Kaempferol                                      | C <sub>15</sub> H <sub>10</sub> O <sub>6</sub>  | 285.0390         | 5.13        | 285/271/204/170         |
| 11                                   | Flavone          | 5.00                       | Hispidulin                                      | C <sub>16</sub> H <sub>12</sub> O <sub>6</sub>  | 299.0547         | 4.69        | 299/284                 |
| <i>Adducts ion [M+H]<sup>+</sup></i> |                  |                            |                                                 |                                                 |                  |             |                         |
| 1                                    | Flavone          | 3.23                       | Typhaneoside                                    | C <sub>34</sub> H <sub>42</sub> O <sub>20</sub> | 771.2345         | 1.10        | 771/625/433             |
| 2                                    | Flavonol         | 3.40                       | Isorhamnetin 3-sophoroside-7-rhamnoside         | C <sub>34</sub> H <sub>42</sub> O <sub>21</sub> | 787.2297         | 0.70        | 787/625/459/317/302/154 |
| 3                                    | Triterpenoid     | 3.43                       | Astragaloside                                   | C <sub>28</sub> H <sub>32</sub> O <sub>17</sub> | 641.1723         | 0.08        | 641/479/317/302/220     |
| 4                                    | Flavonol         | 3.58                       | Rutin (quercetin 3- <i>O</i> -rutinoside)       | C <sub>27</sub> H <sub>30</sub> O <sub>16</sub> | 611.1620         | -0.35       | 611/541/463/303/249/224 |
| 5                                    | Flavonol         | 3.66                       | Isoquercetin (quercetin 3- <i>O</i> -glucoside) | C <sub>21</sub> H <sub>20</sub> O <sub>12</sub> | 465.1036         | 0.49        | 465/303/173             |
| 6                                    | Flavonol         | 3.74                       | Kaempferol-3- <i>O</i> -rutinoside              | C <sub>27</sub> H <sub>30</sub> O <sub>15</sub> | 595.1670         | -0.28       | 595/449/287             |
| 7                                    | Flavonol         | 3.78                       | Isorhamnetin-3- <i>O</i> -rutinoside            | C <sub>28</sub> H <sub>32</sub> O <sub>16</sub> | 625.1773         | 0.21        | 625/479/317             |
| 8                                    | Flavonol         | 3.87                       | Isorhamnetin 3-glucoside                        | C <sub>22</sub> H <sub>22</sub> O <sub>12</sub> | 479.1189         | 1.34        | 479/317/302/153         |
| 9                                    | Flavonol         | 4.48                       | Quercetin                                       | C <sub>15</sub> H <sub>10</sub> O <sub>7</sub>  | 303.0496         | 4.71        | 303/289/198             |
| 10                                   | Flavonol         | 4.62                       | Isorhamnetin                                    | C <sub>16</sub> H <sub>12</sub> O <sub>7</sub>  | 317.0655         | 3.77        | 317/302/198             |
| 11                                   | Flavonol         | 4.84                       | Kaempferol                                      | C <sub>15</sub> H <sub>10</sub> O <sub>6</sub>  | 287.0547         | 4.99        | 287/166                 |
| 12                                   | Flavone          | 5.00                       | Hispidulin                                      | C <sub>16</sub> H <sub>12</sub> O <sub>6</sub>  | 301.0705         | 4.32        | 301/286                 |

**Table S3.** Identification of metabolite components fragments in OFC extract.

| No.                                  | Molecular ion peak and fragmentation | No.                                  | Molecular ion peak and fragmentation |
|--------------------------------------|--------------------------------------|--------------------------------------|--------------------------------------|
| <i>Adducts ion [M-H]<sup>-</sup></i> |                                      | <i>Adducts ion [M+H]<sup>+</sup></i> |                                      |
| 1.                                   |                                      | 1                                    |                                      |
| 2                                    |                                      | 2                                    |                                      |
| 3                                    |                                      | 3                                    |                                      |
| 4                                    |                                      | 4                                    |                                      |
| 5                                    |                                      | 5                                    |                                      |
| 6                                    |                                      | 6                                    |                                      |
| 7                                    |                                      | 7                                    |                                      |
| 8                                    |                                      | 8                                    |                                      |
| 9                                    |                                      | 9                                    |                                      |

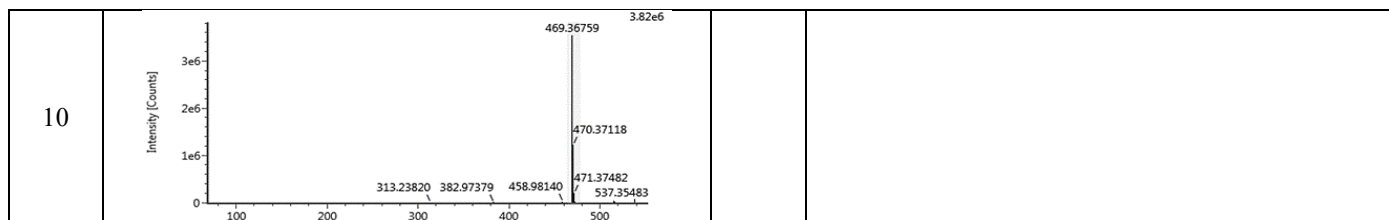

**Table S4.** Identification of metabolite components fragments in OF extract.

| No. | Molecular ion peak and fragmentation<br><i>Adducts ion [M-H]<sup>-</sup></i> | No. | Molecular ion peak and fragmentation<br><i>Adducts ion [M+H]<sup>+</sup></i> |
|-----|------------------------------------------------------------------------------|-----|------------------------------------------------------------------------------|
| 1.  |                                                                              | 1   |                                                                              |
| 2   |                                                                              | 2   |                                                                              |
| 3   |                                                                              | 3   |                                                                              |
| 4   |                                                                              | 4   |                                                                              |
| 5   |                                                                              | 5   |                                                                              |
| 6   |                                                                              | 6   |                                                                              |
| 7   |                                                                              | 7   |                                                                              |

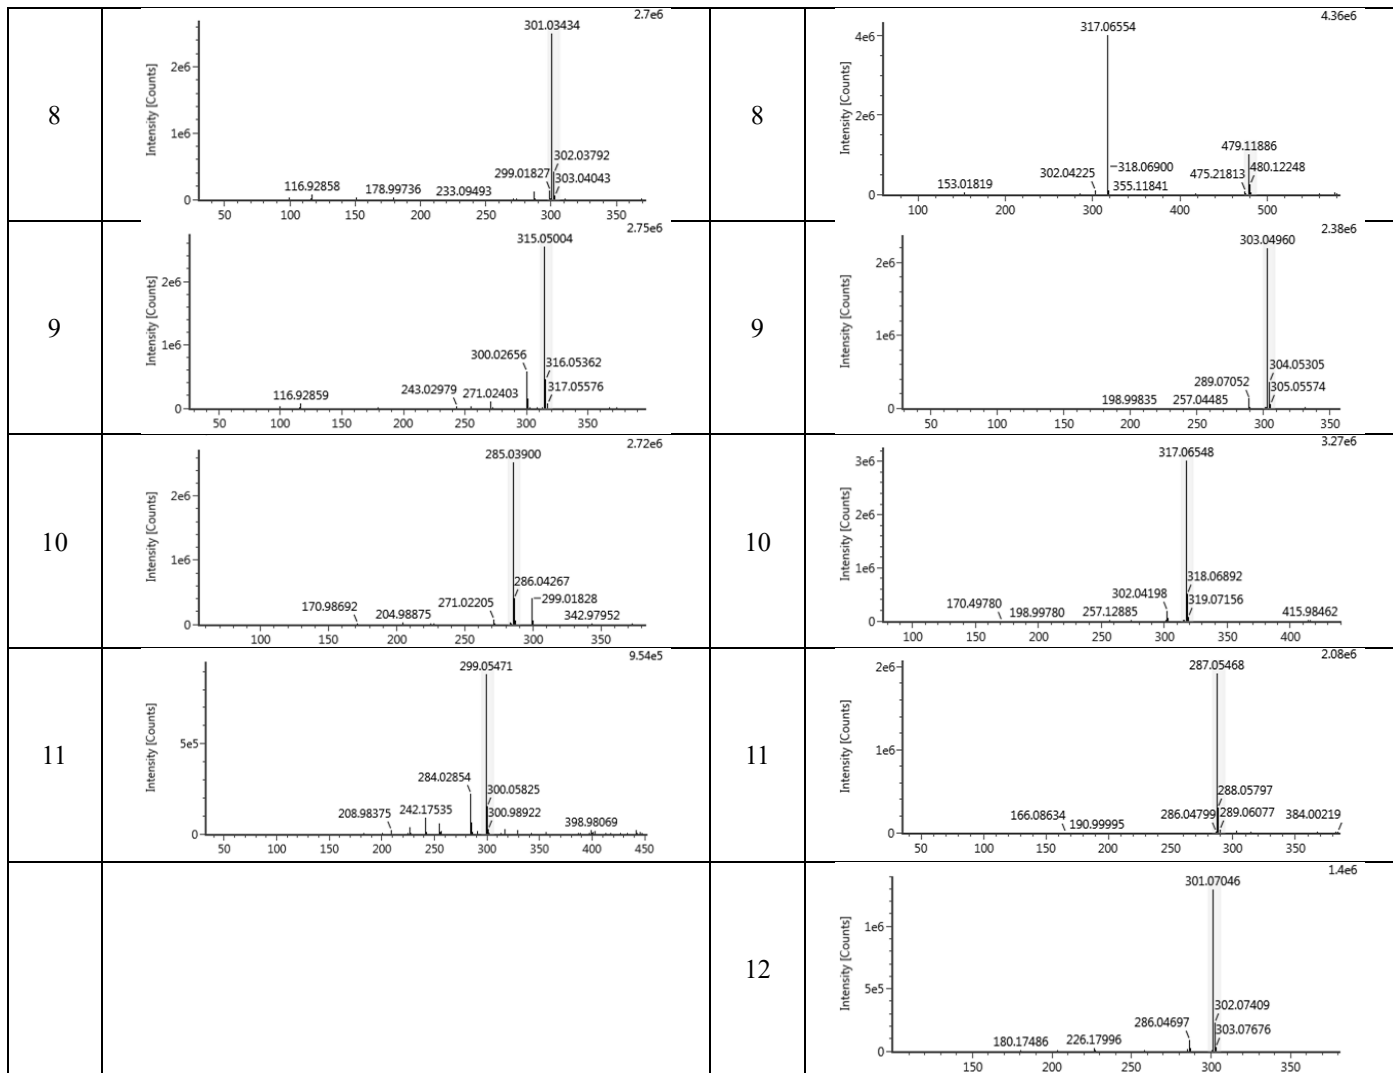

**Table S5.** Energy of complexes formed between selected compounds and target protein

| Compound                                     | Receptor | Toxicity | Binding energy (Kcal/mol) | pKi value (μM) | Interacting Amino Acid Residues                              |
|----------------------------------------------|----------|----------|---------------------------|----------------|--------------------------------------------------------------|
| Selected saponin compounds from OFC extract  |          |          |                           |                |                                                              |
| Poricoic acid H                              | TLR4     | None     | −6.2                      | 28.53          | LYS-47, GLY-70                                               |
| Colossolactone VII                           |          |          | −6.6                      | 14.53          | ALA-118, LEU-138                                             |
| Poricoic acid A                              |          |          | −6.3                      | 24.10          | CYS-40, PRO-49, GLY-70                                       |
| Poricoic acid C                              |          |          | −6.3                      | 24.10          | LYS-47, ILE-48, HIS-68                                       |
| Poricoic acid H                              | MAPK     | None     | −8.3                      | 0.82           | GLY-110, ALA-111, ASP-112, ASP-168                           |
| Colossolactone VII                           |          |          | −7.4                      | 3.77           | ASN-196, SER-251, SER-252                                    |
| Poricoic acid A                              |          |          | −8.2                      | 0.98           | GLY-110, ALA-111, ASP-168                                    |
| Poricoic acid C                              |          |          | −7.8                      | 1.92           | LYS-53                                                       |
| Selected flavonoid compounds from OF extract |          |          |                           |                |                                                              |
| Quercetin                                    | TLR4     | None     | −6.5                      | 17.20          | GLN-163, PHE-165, LYS-166, GLN-188, SER-189, ASP-194         |
| Rutin                                        |          |          | −7.6                      | 2.69           | ILE-218, LEU-238, SER-240, ASP-243, ARG-268                  |
| Kaempferol                                   |          |          | −6.5                      | 17.20          | GLN-163, PHE-165, LYS-166, GLN-188, SER-189, ILE-190         |
| Isoquercetin                                 |          |          | −7.2                      | 5.28           | GLN-142, SER-164, PHE-165, LYS-166, GLN-188, SER-189         |
| Quercetin                                    | MAPK     | None     | −7.3                      | 4.46           | TRP-197, ASP-292                                             |
| Rutin                                        |          |          | −9.0                      | 0.25           | LYS-53, LEU-104, MET-109, GLY-110, ASP-112, ASN-155, ASP-168 |
| Kaempferol                                   |          |          | −7.6                      | 2.69           | TRP-197, ASN-201                                             |
| Isoquercetin                                 |          |          | −8.1                      | 1.16           | LYS-53, LEU-108, MET-109, GLY-120, ASP-168                   |
